# Supplementary material
Source: PubMed Central journal article supplement (PMC7960288)
Supplement: 15-01110.pdf [file 15-01110.pdf]

**On-line Table: Initial presentations and reasons for referral for neurovascular imaging**

| Presentations/Reasons                                               |            |
|---------------------------------------------------------------------|------------|
| <b>Marfan syndrome</b>                                              |            |
| Initial presentation                                                |            |
| Type A or Type B dissection                                         | 15 (25%)   |
| Marfanoid features (skeletal deformities/lens dislocations)         | 14 (23.7%) |
| Family history/asymptomatic                                         | 13 (22%)   |
| Dilated/aneurysm of aortic root                                     | 8 (13.6%)  |
| Valve prolapse/regurgitation                                        | 6 (10.2%)  |
| Aortic rupture                                                      | 1 (1.7%)   |
| Unknown                                                             | 2 (3.4%)   |
| Reason for referral                                                 |            |
| Rule out ICA                                                        | 19 (32.2%) |
| Suspicion of TIA/stroke                                             | 12 (20.3%) |
| Headache                                                            | 9 (15.3%)  |
| Pre-/postop                                                         | 5 (8.5%)   |
| Aneurysm/vascular follow-up                                         | 5 (6.8%)   |
| Seizures                                                            | 1 (1.7%)   |
| Other                                                               | 5 (8.5%)   |
| Unknown/outside referral                                            | 5 (8.5%)   |
| <b>EDS</b>                                                          |            |
| Initial presentation                                                |            |
| Joint hypermobility/dislocations                                    | 54 (54.5%) |
| Arterial dissections                                                | 12 (12.1%) |
| Bruising/increased bleeding time                                    | 9 (9.1%)   |
| Family history/asymptomatic                                         | 9 (9.1%)   |
| Arterial aneurysms                                                  | 7 (7.1%)   |
| Organ perforations/rupture/hemorrhage                               | 5 (5.1%)   |
| Soft skin                                                           | 5 (5.1%)   |
| Other                                                               | 21 (21.2%) |
| Unknown                                                             | 4 (4%)     |
| Reason for referral                                                 |            |
| Headache                                                            | 28 (28.3%) |
| Diagnosis of EDS IV                                                 | 19 (19.2%) |
| Suspicion of TIA/stroke                                             | 14 (14.1%) |
| Dizziness/spells                                                    | 9 (9.1%)   |
| Rule out ICA                                                        | 8 (8.1%)   |
| Arterial dissections/aneurysms                                      | 4 (4%)     |
| Pre-/postop                                                         | 2 (2%)     |
| Other                                                               | 27 (27.3%) |
| Unknown/outside referral                                            | 7 (7.1%)   |
| Type of EDS                                                         |            |
| I                                                                   | 2 (2%)     |
| II                                                                  | 1 (1%)     |
| III                                                                 | 46 (46.5%) |
| IV                                                                  | 40 (40.4%) |
| Unspecified                                                         | 10 (10.1%) |
| <b>NFI</b>                                                          |            |
| Initial presentation                                                |            |
| Neurofibromas/skin nodules                                          | 23 (48.9%) |
| Café au lait spots                                                  | 17 (36.2%) |
| Intracranial lesions                                                | 4 (8.5%)   |
| Family history/asymptomatic                                         | 1 (2.1%)   |
| Other                                                               | 4 (8.5%)   |
| Unknown                                                             | 6 (12.8%)  |
| Reason for referral                                                 |            |
| Rule out intracranial lesions                                       | 14 (29.8%) |
| Suspicion of TIA/stroke                                             | 13 (27.7%) |
| Examination/embolization of known neurofibroma/NFI vascular anomaly | 5 (10.6%)  |
| Headache                                                            | 3 (6.4%)   |
| Seizures                                                            | 3 (6.4%)   |
| Dizziness/spells                                                    | 2 (4.3%)   |
| Other                                                               | 10 (21.3%) |
| Unknown/outside referral                                            | 4 (8.5%)   |

**On-line Table: Continued**

| Presentations/Reasons                       |           |
|---------------------------------------------|-----------|
| <b>LDS</b>                                  |           |
| Initial presentation                        |           |
| Dilated/aneurysm of aortic root             | 7 (29.2%) |
| Phenotypic characteristics/skeletal changes | 5 (20.8%) |
| Family history/asymptomatic                 | 4 (16.7%) |
| Type A or B dissection                      | 4 (16.7%) |
| Valve prolapse/regurgitation                | 3 (12.5%) |
| Aortic rupture                              | 2 (8.3%)  |
| Other                                       | 3 (12.5%) |
| Reason for referral                         |           |
| Rule out ICA                                | 15 (62.5) |
| Aortic aneurysm                             | 4 (16.7%) |
| Suspicion of TIA/stroke                     | 2 (8.3%)  |
| Aortic dissection                           | 1 (4.2%)  |
| Other                                       | 1 (4.2%)  |
| Unknown/outside referral                    | 3 (12.5%) |

**Note:**—postop indicates postoperative.
